# Supplementary material
Source: publisher site journal article supplement (https://www.dovepress.com/article/501079)
Supplement: Supplementary file 1 [file get_supplementary_file.php]

**Table S1:** **Correlation Analysis of Clinical Features with Preoperative SIRI and AGR**

|  | SIRI | | | AGR | | |
| --- | --- | --- | --- | --- | --- | --- |
|  | Lower | Higer | *P* | Lower | Higer | *P* |
| Age |  |  | 0.904 |  |  | **0.041** |
| ≤50 | 18(52.9) | 32(54.2) |  | 18(41.9) | 32(64) |  |
| >50 | 16(47.1) | 27(45.8) |  | 25(58.1) | 18(36) |  |
| Gender |  |  | 0.712 |  |  | 0.941 |
| Female | 14(41.2) | 22(37.3) |  | 17(39.5) | 19(38) |  |
| Male | 20(58.8) | 37(62.7) |  | 26(60.5) | 31(62) |  |
| Size |  |  | 0.176 |  |  | 0.180 |
| ≤5cm | 17(50) | 13(22) |  | 11(25.6) | 19(38) |  |
| >5cm | 17(50) | 46(78) |  | 32(74.4) | 31(62) |  |
| Site |  |  | **0.006** |  |  | 0.862 |
| Limbs | 27(79.4) | 39(66.1) |  | 30(69.8) | 36(72) |  |
| Other | 7(20.6) | 20(33.9) |  | 13(30.2) | 14(28) |  |
| Enneking |  |  | 0.275 |  |  | 0.951 |
| IA/ IB | 9(26.5) | 10(16.9) |  | 9(20.9) | 10(20) |  |
| IIA/ IIB | 25(73.5) | 49(83.1) |  | 34(79.1) | 40(80) |  |
| AJCC |  |  | **0.012** |  |  | 0.928 |
| IA / IB | 9(26.5) | 9(15.3) |  | 8(18.6) | 10(20) |  |
| IIA / IIB | 14(41.2) | 14(23.7) |  | 13(30.2) | 15(30) |  |
| III | 11(32.4) | 36(61) |  | 22(51.2) | 25(50) |  |
| Chemotherapy |  |  | 0.226 |  |  | 0.123 |
| No | 14(41.2) | 17(28.8) |  | 18(41.9) | 13(26) |  |
| Yes | 20(58.8) | 42(71.2) |  | 25(58.1) | 37(74) |  |
| Radiotherapy |  |  | 0.280 |  |  | 0.138 |
| No | 24(70.6) | 35(59.3) |  | 31(72.1) | 28(56) |  |
| Yes | 10(29.4) | 24(40.7) |  | 12(27.9) | 22(44) |  |
| Recurrence |  |  | 0.095* |  |  | 0.184 |
| No | 26(76.5) | 35(59.3) |  | 25(58.1) | 25(58.1) |  |
| Yes | 8(23.5) | 24(40.7) |  | 18(41.9) | 18(41.9) |  |
| Metastasis |  |  | **0.001** |  |  | **0.002** |
| No | 28(82.4) | 27(45.8) |  | 18(41.9) | 37(74) |  |
| Yes | 6(17.6) | 32(54.2) |  | 25(58.1) | 13(26) |  |

Note: Bold indicates statistical significance(*P*<0.05), and an asterisk (*) signifies a p-value between 0.05 and 0.1.
